# Supplementary material for: Dietary nucleotides supplementation during the suckling period improves the antioxidative ability of neonates with intrauterine growth retardation when using a pig model
Source: Royal Society of Chemistry journal article supplement (doi:10.1039/c8ra00701b), 2018-01-01
Supplement: c8ra00701b1.pdf [file c8ra00701b1.pdf]

1 **Supplementary table 1.** Composition and nutrient level of the basal formula milk powder (87.5

2 % DM basis, %)

| Ingredients                       | %      |
|-----------------------------------|--------|
| Whole-milk powder (24% CP)        | 58.00  |
| Whey protein concentrate (34% CP) | 25.00  |
| Casein                            | 5.70   |
| Coconut oil                       | 10.00  |
| CaH <sub>2</sub> PO <sub>4</sub>  | 0.10   |
| Choline chloride (50%)            | 0.10   |
| Vitamin premix*                   | 0.10   |
| Mineral premix†                   | 0.50   |
| L-Arg (98.5%)                     | 0.06   |
| DL-Met (98.5%)                    | 0.06   |
| L-Lys·HCl (78.5%)                 |        |
| L-Thr (98%)                       | 0.03   |
| L-Trp (98%)                       | 0.05   |
| Total                             | 100.00 |
| Nutrient content                  |        |
| Digestible energy (kJ/kg)         | 18390  |
| CP (%)                            | 25.30  |
| Ca (%)                            | 1.02   |
| Total P (%)                       | 0.81   |
| Available P (%)                   | 0.67   |
| Digestible Lys (%)                | 1.93   |
| Digestible Met (%)                | 0.63   |
| Digestible Arg (%)                | 0.86   |

3 CP, crude protein.

4 \*Vitamin premix provided per kg powder diet: vitamin A, 0.94 mg; vitamin D<sub>3</sub>, 0.01 mg; vitamin  
5 E, 20 mg; vitamin K<sub>3</sub>, 1 mg; vitamin B<sub>12</sub>, 0.04 mg; riboflavin, 5 mg; niacin, 20 mg; pantothenic  
6 acid, 15 mg; folic acid, 1.5 mg; thiamin, 1.5 mg; pyridoxine, 2 mg; biotin, 0.1 mg.

7 †Mineral premix provided per kg powder diet: Zn, 90 mg; Mn, 4.0 mg; Fe, 90 mg; Cu, 6.0 mg; I,  
8 0.2 mg; Se, 0.3 mg.

9

10 **Supplementary table 2.** Primer sequences of target and reference genes

| Gene            | Genebank accession No. | Primer sequence                                                  | Amplification length (bp) | Annealing temperature (°C) |
|-----------------|------------------------|------------------------------------------------------------------|---------------------------|----------------------------|
| CAT             | NM_214301.2            | 5'- ACTTCTGGAGCCTACGTCCT-3'<br>5'-ATCCGTTTCATGTGCCTGTGT-3'       | 93                        | 60                         |
| iNOS            | NM_001143690.1         | 5'-AGAGCCTCTGGACCTCAACA-3'<br>5'-CTCACAGCAGAGTTCACCA-3'          | 136                       | 60                         |
| GP <sub>x</sub> | NM_214201.1            | 5'-GCTCGGTGTATGCCTTCTCT-3'<br>5'-AGCGACGCTACGTTCTCAAT-3'         | 103                       | 60                         |
| GR              | AY368271.1             | 5'-CTACGTGAGCCGACTGAACA-3'<br>5'-TCAGGATGTGAGGAGCTGTG-3'         | 146                       | 60                         |
| CuZn-SOD        | GU944822.1             | 5'-GAGACCTGGGCAATGTGACT-3'<br>5'-CTGCCAAGTCATCTGGTTT-3'          | 139                       | 60                         |
| Mn-SOD          | NM_214127.2            | 5'-TGGAGGCCACATCAATCATA-3'<br>5'-AGCGGTCAACTTCTCCTTGA-3'         | 136                       | 60                         |
| ESOD            | NM_001078688.1         | 5'-ACGCTGCTCTGTGCTTACCT-3'<br>5'-TCAACTCCTGCCAGATCTCC-3'         | 142                       | 60                         |
| Nrf2            | XM_003133500.5         | 5'-GCCCTGGAAGCGTTAAAC-3'<br>5'-GGACTGTATCCCCAGAAGGTTGT-3'        | 67                        | 60                         |
| Keap-1          | NM_001114671.1         | 5'-ACGACGTGGAGACAGAAACGT-3'<br>5'-GCTTCGCCGATGCTTCA-3'           | 56                        | 60                         |
| PGC-1 $\alpha$  | NM_213963              | 5'-CCCGAAACAGTAGCAGAGACAAG-3'<br>5'-CTGGGGTTCAGAGGAAGAGATAAAG-3' | 111                       | 60                         |
| TFAM            | AY923074.1             | 5'-GGTCCATCACAGGTAAGCTGAA-3'<br>5'-ATAAGATCGTTTCGCCCAACTTC-3'    | 167                       | 60                         |
| NRF-1           | AK237171.1             | 5'-GCCAGTGAGATGAAGAGAAACG-3'<br>5'-CTACAGCAGGGACCAAAGTTCAC-3'    | 166                       | 60                         |
| mt SSB          | AK352341.1             | 5'-CTTTGAGGTAGTGCTGTGTCG-3'<br>5'-CTCACCCCTGACGATGAAGAC-3'       | 143                       | 60                         |
| mt polr         | XM_001927064.1         | 5'-CTTTGAGGTTTTCCAGCAGCAG-3'<br>5'-GCTCCAGTTTTGGTTGACAG-3'       | 119                       | 60                         |
| SIRT-1          | EU030283.2             | 5'-TGACTGTGAAGCTGTACGAGGAG-3'<br>5'-TGGCTCTATGAAACTGCTCTGG-3'    | 143                       | 60                         |
| $\beta$ -actin  | DQ845171.1             | 5'-GGCGCCAGCAGCAT-3'<br>5'-CCGATCCACACGGAGTACTTG-3'              | 66                        | 60                         |
| GAPDH           | NM_001206359.1         | 5'-TCGGAGTGAACGGATTTGGC-3'<br>5'-TGCCGTGGGTGGAATCATAAC-3'        | 147                       | 60                         |

11 CAT, catalase; iNOS, nitric oxide synthase 2, inducible; GP<sub>x</sub>, glutathione peroxidase; GR,  
12 glutathione reductase; CuZn-SOD, copper/zinc superoxide dismutase, cytoplasmic; Mn-SOD,  
13 manganese superoxide dismutase, mitochondrial; ESOD, extracellular superoxide dismutase;  
14 Nrf2, nuclear erythroid 2-related factor 2; Keap1, Kelch-like ECH-associated protein 1; GAPDH,  
15 glyceraldehyde-3-phosphate dehydrogenase; PGC-1 $\alpha$ , PPAR $\gamma$  coactivator-1 $\alpha$ ; TFAM,  
16 mitochondrial transcription factor A; NRF-1, nuclear respiratory factor-1; mt SSB, mitochondrial  
17 single-strand DNA-binding protein; mt polr, mitochondrial polymerase r; SIRT-1, mammalian  
18 silencing information regulator.

19

20 **Supplementary table 3.** Primer and probe sequences used for determination of mtDNA content.

| Gene                 | Genebank accession No. | Primer sequence                                   | Amplification length (bp) | Annealing temperature (°C) |
|----------------------|------------------------|---------------------------------------------------|---------------------------|----------------------------|
| Mitochondrial D-loop | AF276923               | 5'-GATCGTACATAGCACATATCATGTC-3'                   | 198                       | 60                         |
|                      |                        | 5'-GGTCCTGAAGTAAGAACCAGATG-3'                     |                           |                            |
| β-actin              | DQ452569               | 5'- (FAM) CCAGTCAACATGCGTATCACCACCA(Eclipse) -3'  | 74                        | 60                         |
|                      |                        | 5'-CCCCTCCTCTCTTGCCTCTC -3'                       |                           |                            |
|                      |                        | 5'-AAAAGTCCTAGGAAAATGGCAGAAG -3'                  |                           |                            |
|                      |                        | 5'- (FAM) TGCCACGCCCTTTCTCACTTGTTCT (Eclipse) -3' |                           |                            |

21

22
